# Supplementary material for: Mn2O3 hollow spheres synthesized based on an ion-exchange strategy from amorphous calcium carbonate for highly efficient trace-level uranyl extraction
Source: Royal Society of Chemistry journal article supplement (doi:10.1039/c6en00411c), 2016-01-01
Supplement: c6en00411c1.pdf [file c6en00411c1.pdf]

## Supporting Information for

# Mn<sub>2</sub>O<sub>3</sub> Hollow Spheres Synthesized Based on Ion-exchange Strategy from Amorphous Calcium Carbonate for Highly Efficient Trace-level Uranyl Extraction

Zanyong Zhuang,<sup>b,c</sup> Hong Chen,<sup>d</sup> Zhang Lin<sup>a,c,\*</sup> and Zhi Dang<sup>a</sup>

<sup>a</sup> School of Environment and Energy, South China University of Technology, The Key Lab of Pollution Control and Ecosystem Restoration in Industry Clusters (Ministry of Education), Guangzhou Higher Education Mega Center, Guangzhou 510006, China E-mail: zlin@scut.edu.cn

<sup>b</sup> College of Materials Science and Engineering, Fuzhou University, New Campus, Minhou, Fujian Province 350108, China

<sup>c</sup> Key Laboratory of Design and Assembly of Functional Nanostructures, Fujian Institute of Research on the Structure of Matter, Chinese Academy of Sciences, Fuzhou, Fujian 350002, China

<sup>d</sup> Department of Organic Chemistry, KTH Royal Institute of Technology, 10044 Stockholm, Sweden

## Experimental Sections

**Chemicals.** All chemicals are analytical grade. Calcium chloride (CaCl<sub>2</sub>), anhydrous sodium carbonate (Na<sub>2</sub>CO<sub>3</sub>), magnesium chloride hexahydrate (MgCl<sub>2</sub>), manganese sulfate (MnSO<sub>4</sub>), potassium permanganate (KMnO<sub>4</sub>) and ethanol (C<sub>2</sub>H<sub>5</sub>OH) are of analytical grade. All chemicals were purchased from Alfa Aesar and used without further purification. HCl solution (37 %) were purchased from National Medicines Corporation Ltd. of China. Distilled water (18.0 MΩ · cm<sup>-1</sup>) in the experiments was prepared by using an ultra-pure purification system. Synthetic uranyl solution (8 mg/L) was prepared by dissolving UO<sub>2</sub>(AC)<sub>2</sub> · 2H<sub>2</sub>O into deionized water. Samples of salt lake water were retrieved from a salt lake in Qinghai Province, China.

**Synthesis of Magnesium Amorphous Calcium Carbonate (Mg-ACC).** The Mg-ACC was prepared by a typical procedure as follows: CaCl<sub>2</sub> (0.025 mol) and MgCl<sub>2</sub> (0.1 mol) were dissolved in 150 mL distilled water, and Na<sub>2</sub>CO<sub>3</sub> (0.025 mol) was dissolved in another 150 mL distilled water. Then, the two solutions were fast mixed under stirring for 1 min at room temperature. After that, the mixed solution was centrifuged at 8000 rpm for 5 min. The white precipitate Mg:ACC was extracted, washed with distilled water and ethanol, and dried under vacuum condition at room temperature.

**Phase Transformation of Mg-ACC to MnCO<sub>3</sub> and Mn<sub>2</sub>O<sub>3</sub>.** MnSO<sub>4</sub> (0.01 mol) was dissolved in 50 mL water. Then as-prepared Mg:ACC (0.17 g) was added into MnSO<sub>4</sub> solution at room temperature, which was stirred for 0.5 h and formed the MnCO<sub>3</sub>. After that, 50 mL KMnO<sub>4</sub> solution (0.03 M) was added into the above solution and kept for 5 min with stirring. Finally, the sample was centrifuged at 8000 rpm for 5 min. The precipitate was dissolved into the diluted HCl solution (3.7 %) under room temperature. The final sample was centrifuged at 8000 rpm for 5 min, washed with distilled water and ethanol, and dried under vacuum.

**Adsorption Kinetics.** Batch adsorption experiments were conducted by equilibrating 0.1-1 g/L Mn<sub>2</sub>O<sub>3</sub> in synthetic uranyl solution (8 mg/L) or in the salt lake water sample. At pre-determined time intervals, a fraction of sample was centrifuged at the speed of 8000 rpm for 5 min. The concentration of uranyl in the supernatant was analyzed by an ultraviolet pulse trace uranium analyzer (WGJ-III).

## Characterization.

XRD data were collected on a PANalyticalX'-Pert PRO diffractometer with Cu Kα radiation (40 kV, 40 mA) in the continuous scanning mode. The 2θ scanning range was from 5 to 85° in steps of 0.008° with a collection time of 50 s per step. The morphology and size of the solids were characterized with a JEOL- 6700F SEM and JEOL JEM2010 TEM coupled with an energy dispersive X-ray spectroscopy (Oxford) system. X-ray photoelectron spectrometer (XPS, PHI

5000 Versa Probe) was used in the sample surface analysis. The concentration of uranyl in the supernatant was analyzed by an ultraviolet pulse trace uranium analyzer (WGJ-III).

**Table S1.** Comparison of adsorption capacity of adsorbents listed in literatures (with the initial uranyl concentration around 10 mg/L).

| Samples                              | Initial Uranyl concentration (mg/L) | Equilibrium Capacity (mg/g) | Ref.      |
|--------------------------------------|-------------------------------------|-----------------------------|-----------|
| Mn <sub>2</sub> O <sub>3</sub> -HHNs | 8                                   | 63                          | This work |
| Mg(OH) <sub>2</sub> Nanoflowers      | 10                                  | <11                         | [1]       |
| Layered Metal Sulfides               | 3.3                                 | <4                          | [2]       |
| Mesoporous Mg(OH) <sub>2</sub>       | 10                                  | 58                          | [3]       |
| TiO <sub>2</sub>                     | 2.4                                 | ~6                          | [4]       |
| Quartz-Chlorite Mineral              | 1.2                                 | ~5                          | [5]       |
| Polysulfide/Layered Double Hydroxide | 22                                  | ~22                         | [6]       |

**Table S2.** Concentration of elements in Salt Lake water.

| Element | g/L  | Element | mg/L |
|---------|------|---------|------|
| K       | 241  | Ni      | 1.7  |
| Na      | 514  | Mo      | 0.1  |
| Mg      | 171  | Zn      | 0.4  |
| Ca      | 0.79 | Cu      | 0.4  |
| B       | 1.07 | Fe      | 2.0  |
| Li      | 0.33 | U       | 0.26 |

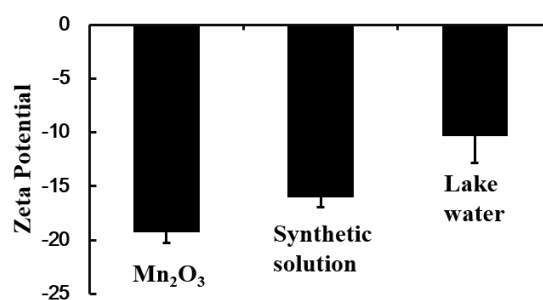

**Figure S1.** Zeta potential of primary Mn<sub>2</sub>O<sub>3</sub>-HHN; Mn<sub>2</sub>O<sub>3</sub>-HHNs performed in synthetic uranyl solution and a salt lake water, respectively.

**References for Supporting Information**

1. Q. Cao, F. Huang, Z. Zhuang and Z. Lin, *Nanoscale*, 2012, **4**, 2423-2430.
2. M. J. Manos and M. G. Kanatzidis, *Journal of the American Chemical Society*, 2012, **134**, 16441-16446.
3. H. Yan, J. Bai, X. Chen, J. Wang, H. Zhang, Q. Liu, M. Zhang and L. Liu, *RSC Advances*, 2013, **3**, 23278-23289.
4. M. J. Comarmond, T. E. Payne, J. J. Harrison, S. Thiruvoth, H. K. Wong, R. D. Aughterson, G. R. Lumpkin, K. Muller and H. Foerstendorf, *Environmental Science & Technology*, 2011, **45**, 5536-5542.
5. Z. M. Wang, J. M. Zachara, J. Y. Shang, C. Jeon, J. Liu and C. X. Liu, *Environmental Science & Technology*, 2014, **48**, 7766-7773.
6. S. L. Ma, L. Huang, L. J. Ma, Y. Shim, S. M. Islam, P. L. Wang, L. D. Zhao, S. C. Wang, G. B. Sun, X. J. Yang and M. G. Kanatzidis, *Journal of the American Chemical Society*, 2015, **137**, 3670-3677.
